# Supplementary material
Source: Springer Nature journal article supplement (https://www.springermedizin.de/resource/supplementary/13033_2014_199_MOESM1_ESM.pdf/9652044)

Percentage of correct answers

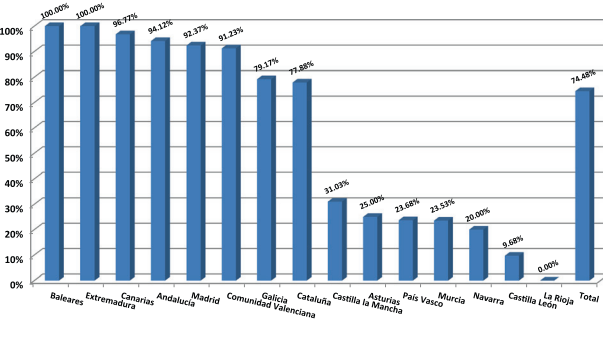

Percentage of correct answers

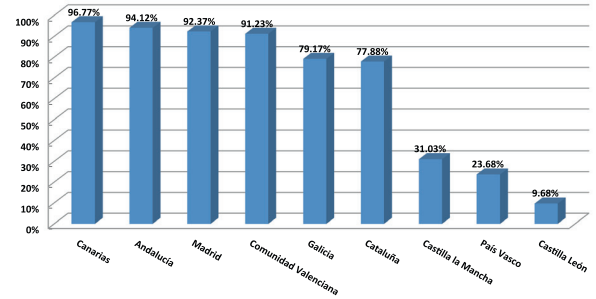

b

Percentage of correct answers

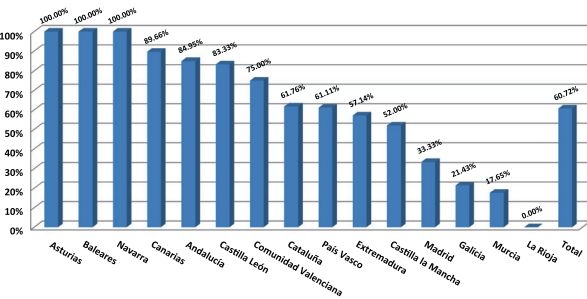

Percentage of correct answers

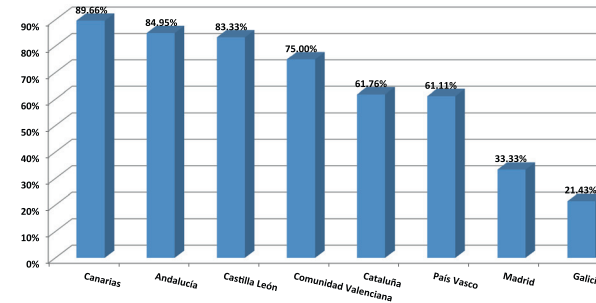

c

Percentage of correct answers

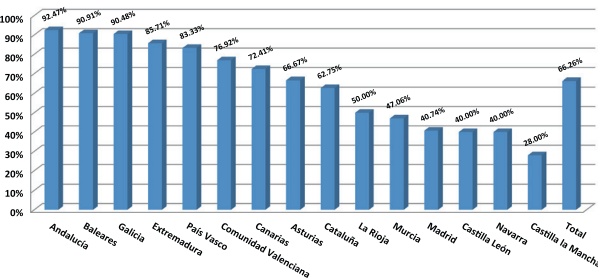

Percentage of correct answers

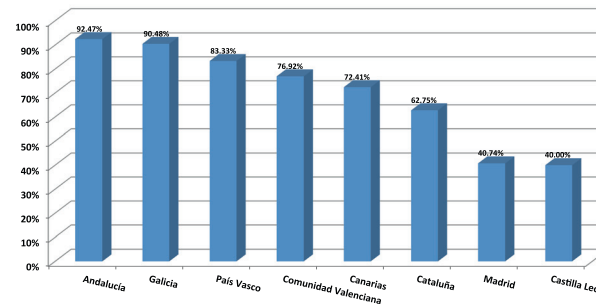

Supplement: MOESM1 [file 9652044]
